# Supplementary material for: Environmental pH stress influences cellular secretion and uptake of extracellular vesicles
Source: PubMed Central journal article supplement (PMC7931216; doi:10.1002/2211-5463.13107), 2021-02-18
Supplement: FEB4-11-753-s001.pdf [file FEB4-11-753-s001.pdf]

## **Supplementary Information**

### **Title:**

**Environmental pH stress influences cellular secretion and uptake of extracellular vesicles**

### **Authors:**

Ikuhiko Nakase<sup>1,2,\*</sup>, Natsumi Ueno<sup>1,2</sup>, Mie Matsuzawa<sup>2</sup>, Kosuke Noguchi<sup>1,2</sup>, Mami Hirano<sup>1,2</sup>, Mika Omura<sup>1,2</sup>, Tomoya Takenaka<sup>1,2</sup>, Ayaka Sugiyama<sup>1,2</sup>, Nahoko Bailey Kobayashi<sup>3,4</sup>, Takuya Hashimoto<sup>5</sup>, Tomoka Takatani-Nakase<sup>6,7</sup>, Eiji Yuba<sup>5</sup>, Ikuo Fujii<sup>1</sup>, Shiroh Futaki<sup>8</sup>, and Tetsuhiko Yoshida<sup>3,4</sup>

### **Affiliations:**

<sup>1</sup>Graduate School of Science, Osaka Prefecture University, 1-1, Gakuen-cho, Naka-ku, Sakai, Osaka 599-8531, Japan

<sup>2</sup>NanoSquare Research Institute, Osaka Prefecture University, 1-2, Gakuen-cho, Naka-ku, Sakai, Osaka 599-8531, Japan

<sup>3</sup>Keio University School of Medicine, 2, Okubo, Tsukuba, Ibaraki 300-2611, Japan

<sup>4</sup>Institute for Advanced Sciences, Toagosei Co., Ltd., 2, Okubo, Tsukuba, Ibaraki 300-2611, Japan

<sup>5</sup>Department of Applied Chemistry, Graduate School of Engineering, Osaka Prefecture University, 1-1, Gakuen-cho, Naka-ku, Sakai-shi, Osaka 599-8531, Japan

<sup>6</sup>Department of Pharmaceutics, School of Pharmacy and Pharmaceutical Sciences, Mukogawa Women's University, 11-68, Koshien Kyuban-cho, Nishinomiya, Hyogo 663-8179, Japan

<sup>7</sup>Institutre for Bioscience, Mukogawa Women's University, 11-68, Koshien Kyuban-cho, Nishinomiya, Hyogo 663-8179, Japan

<sup>8</sup>Institute for Chemical Research, Kyoto University, Gokasho, Uji, Kyoto 611-0011, Japan

**\*Correspondence to:** Ikuhiko Nakase, Graduate School of Science, Osaka Prefecture University, 1-1, Gakuen-cho, Naka-ku, Sakai, Osaka 599-8531, Japan. Tel: +81 722549895, Fax: +81 722549895, e-mail: i-nakase@21c.osakafu-u.ac.jp.

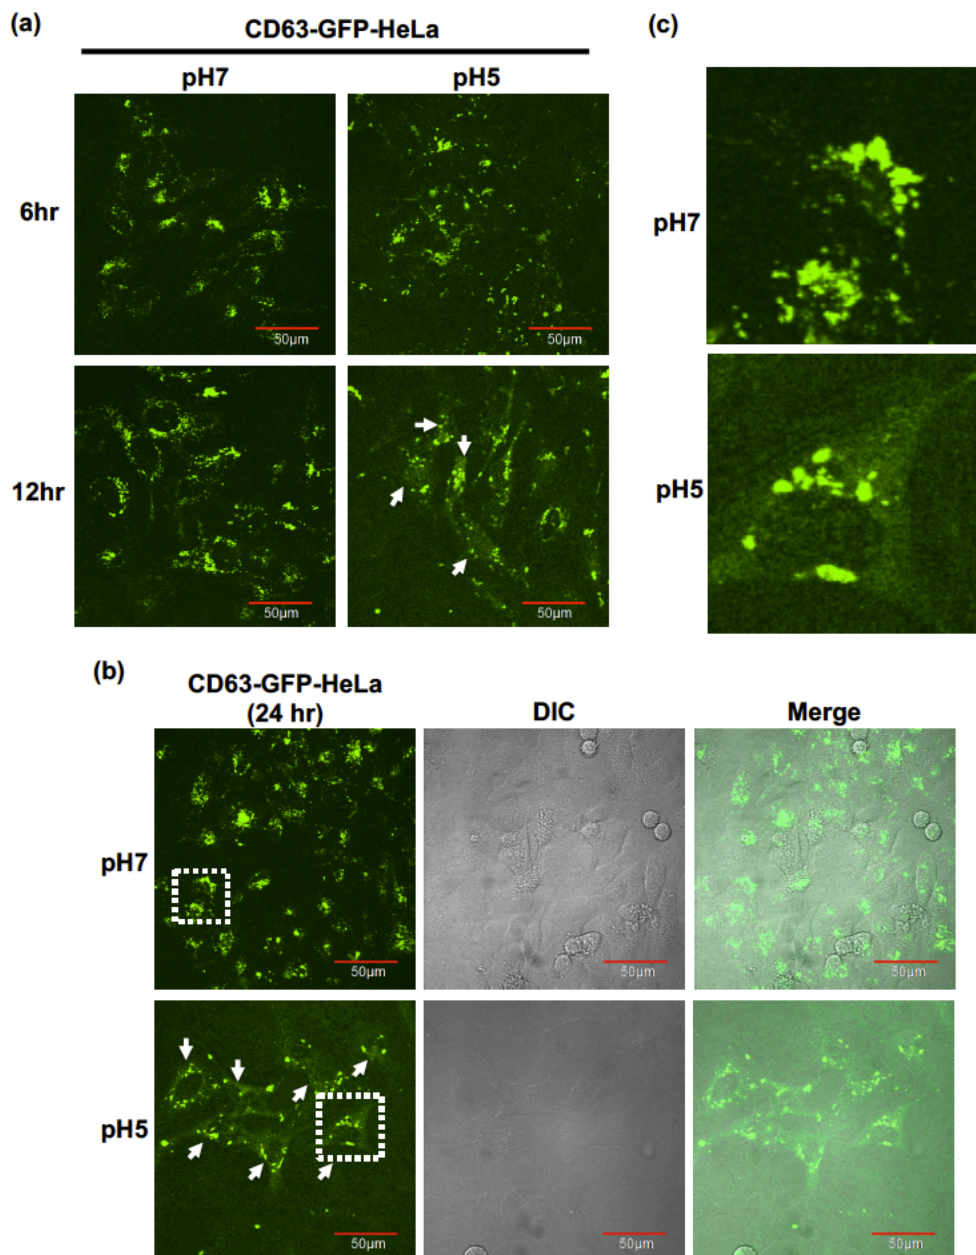

**Supplementary Figure S1.** Effects of low pH cell culture condition on expression of CD63-GFP fusion proteins. (a, b) Confocal microscopic observation of CD63-GFP fusion proteins stably expressing HeLa cells cultured for 6, 12 (a), and 24 h (b) at 37°C in  $\alpha$ -MEM (pH 7 or 5) with 10% FBS. Scale bar, 50  $\mu$ m. Arrows show typical cells with diffused GFP signals in cytosol. (c) Enlarged pictures of (b) (areas within the white dot squares).

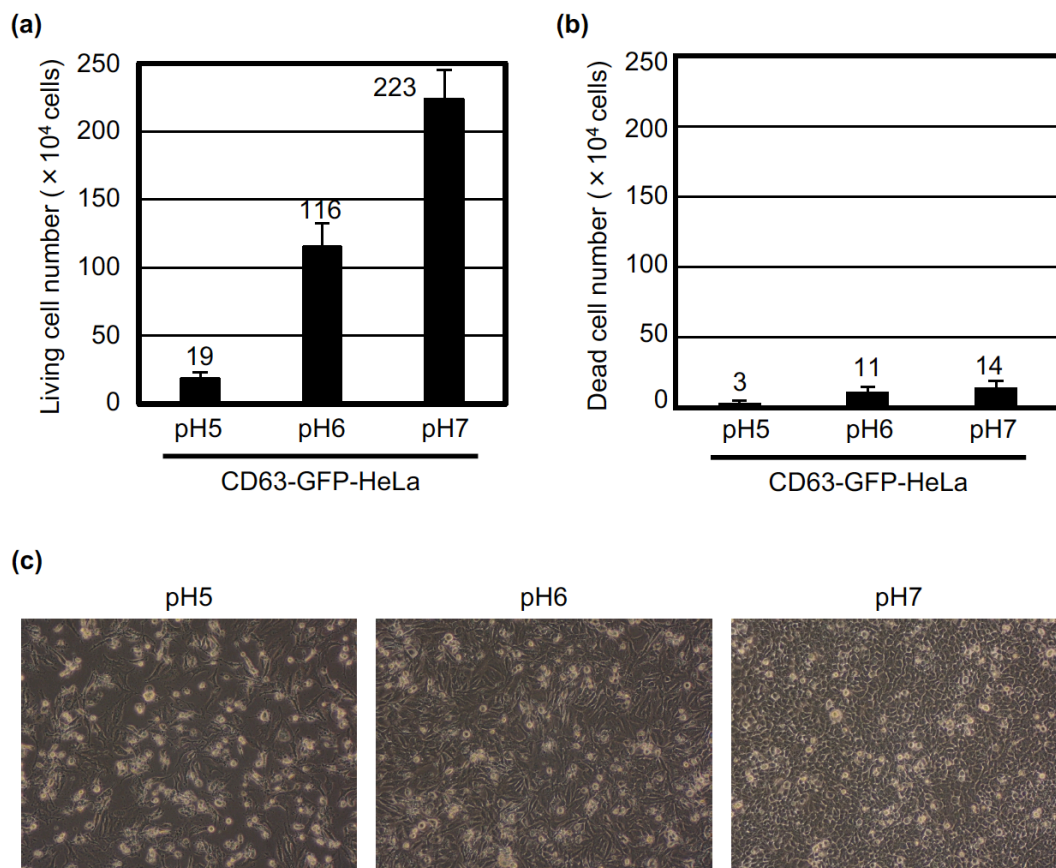

**Supplementary Figure S2.** Viability of cells stably expressing the CD63-GFP fusion protein. **(a,** **b)** Living **(a)** or dead **(b)** cell counting assay after culture of HeLa cells stably expressing the CD63-GFP fusion protein for 24 h at 37°C in  $\alpha$ -MEM (pH 5, 6, or 7) with 10% FBS in trypan blue stain methods. The data are expressed as the mean ( $\pm$  SD) of three experiments. **(c)** Microscopic observation of CD63-GFP fusion proteins stably expressing HeLa cells in  $\alpha$ -MEM (pH 5, 6, or 7) with 10% FBS for 48 h at 37°C.

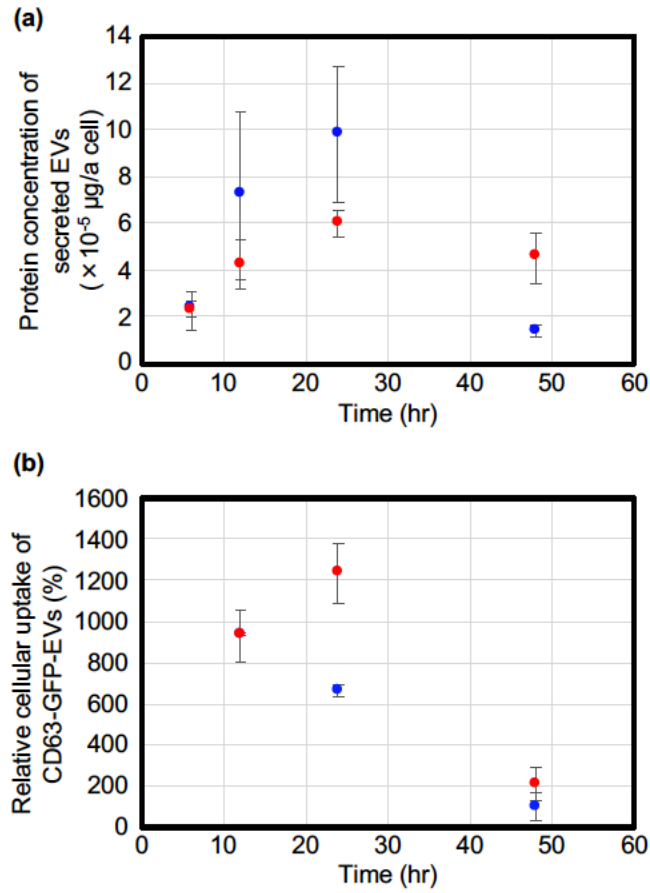

**Supplementary Figure S3.** Protein content of secreted EVs under low pH cell culture condition and their cellular uptake. **(a)** Relative protein concentration of EVs/cell number under different pH (pH 5 (red) or 7 (blue)) cell culture condition. EVs secreted from CD63-GFP-HeLa cells (6, 12, 24, or 48 h, 37°C) were analyzed by BCA protein assay, and each protein concentration was divided by the cell number. The data are expressed as the mean ( $\pm$  SD) of three experiments. **(b)** Cellular uptake (serum-starved condition) of isolated EVs. The relative cellular uptake of isolated CD63-GFP-EVs (20  $\mu\text{g}/\text{mL}$  for 12, 24, or 48 h at 37°C in MEM (pH 7) without FBS) secreted under pH 7 (blue) or pH 5 (red) cell culture condition, analyzed using a flow cytometer (detection for 10,000 live cells). The data are expressed as the mean ( $\pm$  SD) of three experiments.

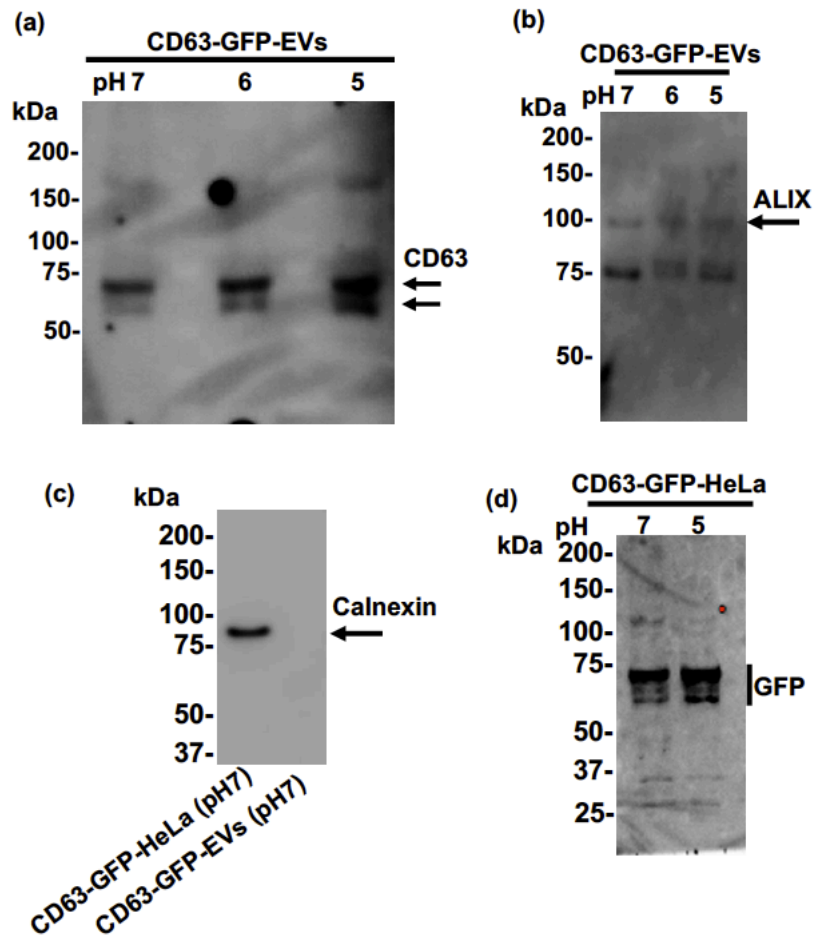

**Supplementary Figure S4.** Western blot analyses of CD63-GFP-EVs and CD63-GFP-HeLa cells. Western blot analyses (anti-CD63 (a), anti-ALIX (b), anti-calnexin (c), and anti-GFP (d)) showing the EVs secreted from CD63-GFP-HeLa under pH5, 6, or 7 condition (48 hr) (a, b), lysate of CD63-GFP-HeLa (pH7, 48 hr) and CD63-GFP-EVs (pH7, 48 hr) (c), and lysate of CD63-GFP-HeLa (pH7 or pH5, 48 hr) (d).

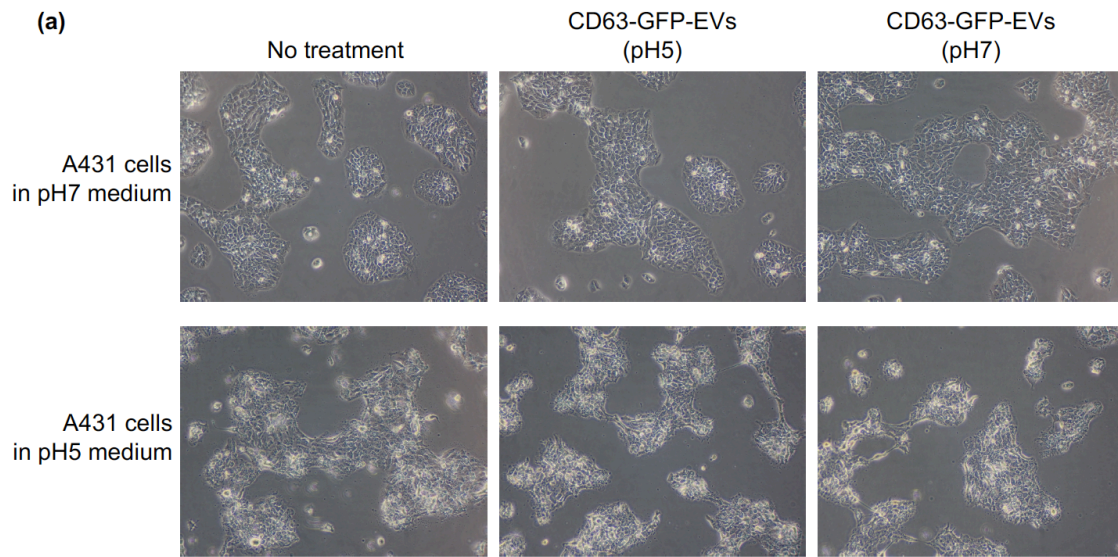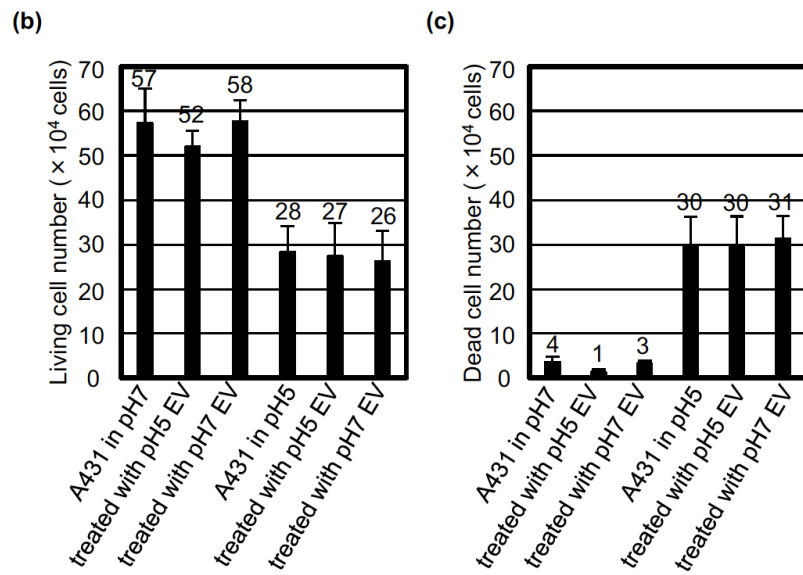

**Supplementary Figure S5.** Cell viability under cellular EV uptake experiments in serum-starved condition. **(a)** Microscopic observation of A431 cells treated with isolated CD63-GFP-EVs (20  $\mu\text{g}/\text{mL}$  for 48 h at 37°C in MEM (pH 5 or 7) without FBS) secreted under pH 7 or pH 5 cell culture condition. **(b, c)** Living **(b)** or dead **(c)** cell counting assay after cellular EV uptake experiments of **(a)** in trypan blue staining method. The data are expressed as the mean ( $\pm$  SD) of three experiments.

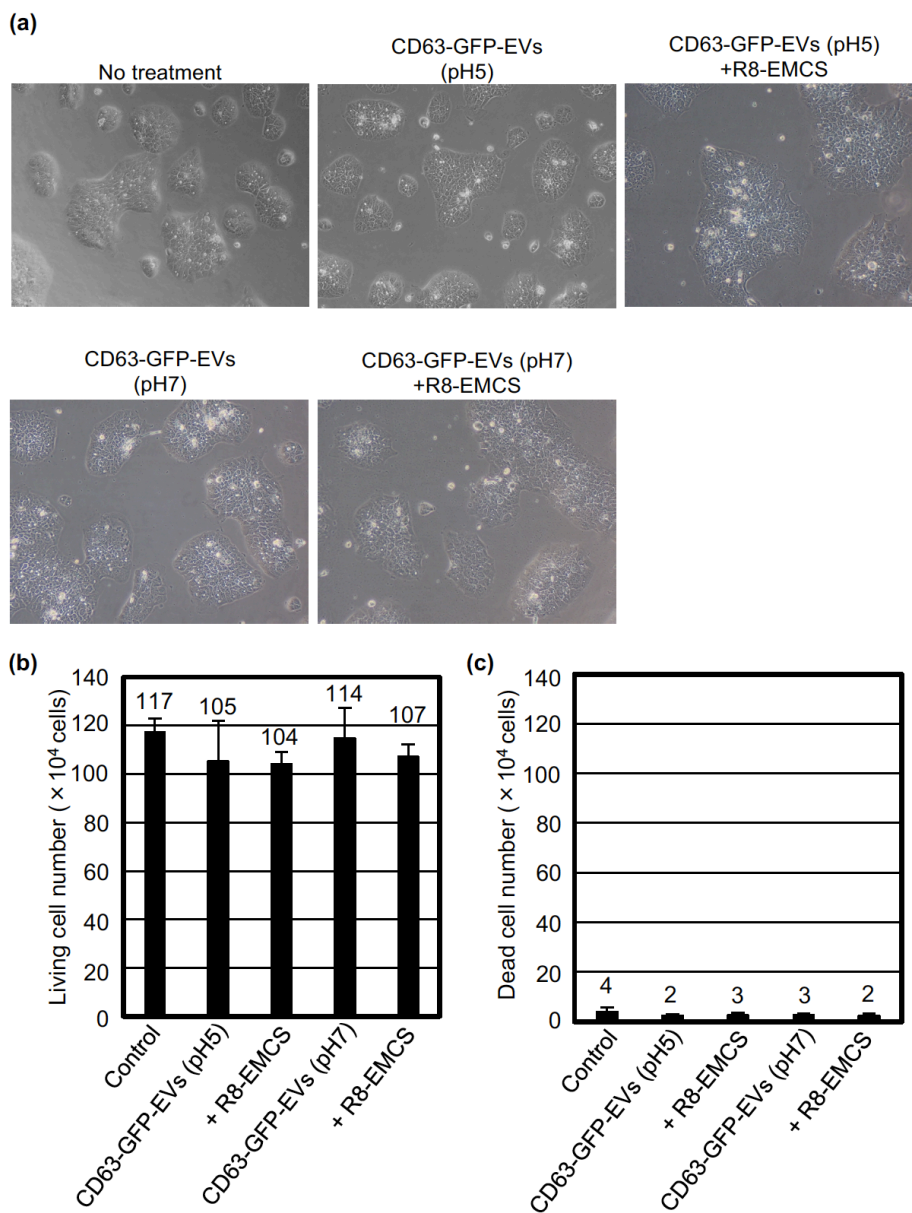

**Supplementary Figure S6.** Cell viability under cellular EV uptake experiments in 10% FBS containing condition. **(a)** Microscopic observation of A431 cells treated with isolated CD63-GFP-EVs (20  $\mu\text{g}/\text{mL}$  for 24 h at 37°C in MEM (pH 7) with 10% FBS), secreted under pH 7 or pH 5 cell culture condition. **(b, c)** Living **(b)** or dead **(c)** cell counting assay after cellular EV uptake experiments of **(a)** by trypan blue staining. The data are expressed as the mean ( $\pm$  SD) of three experiments.
